# Supplementary material for: Nanostructured Carbonated Hydroxyapatite Associated to rhBMP-2 Improves Bone Repair in Rat Calvaria
Source: MDPI journal article supplement (doi:10.3390/jfb11040087), 2020-12-04
Supplement: s1 [file s1]

Supplementary File

## Nanostructured Carbonated Hydroxyapatite Associated to rhBMP-2 Improves Bone Repair in Rat Calvaria

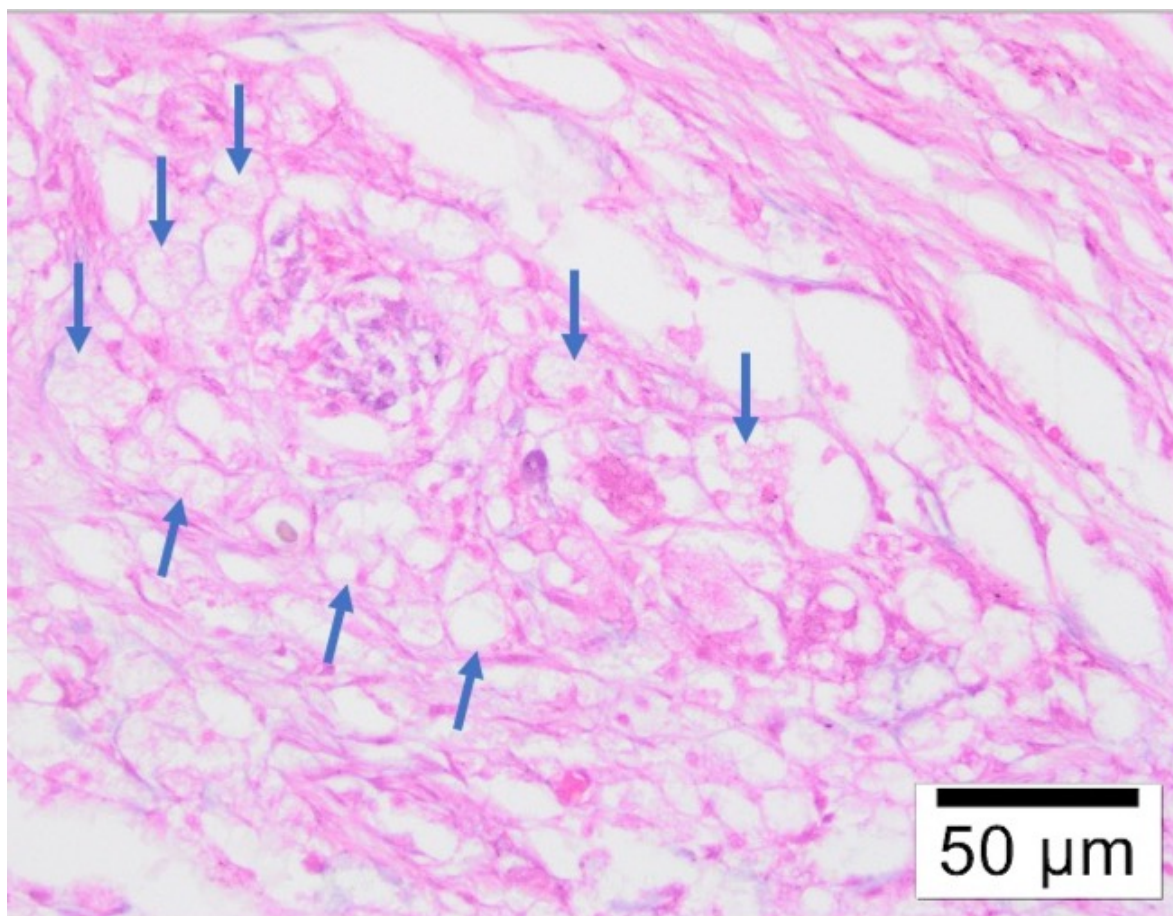

**Figure S1.** Photomicrograph representative of inflammatory infiltrate predominated by macrophages (blue arrows) of COL/rhBMP-2 group. Magnification: 40×; Stain: Hematoxylin and Eosin.
